# Supplementary material
Source: PubMed Central journal article supplement (PMC9909569)
Supplement: jamasurg-e227853-s001.pdf [file jamasurg-e227853-s001.pdf]

## Data Sharing Statement

Johnson. Variability in Organ Procurement Organization Performance by Individual Hospital in the United States. *JAMA Surg.* Published February 08, 2023. doi:10.1001/jamasurg.2022.7853

### Data

**Data available:** No

### Additional Information

**Explanation for why data not available:** Individual patient data is HIPPA protected.
